# Supplementary material
Source: PubMed Central journal article supplement (PMC5103708)

Figure S2 Related to Figure 2

A

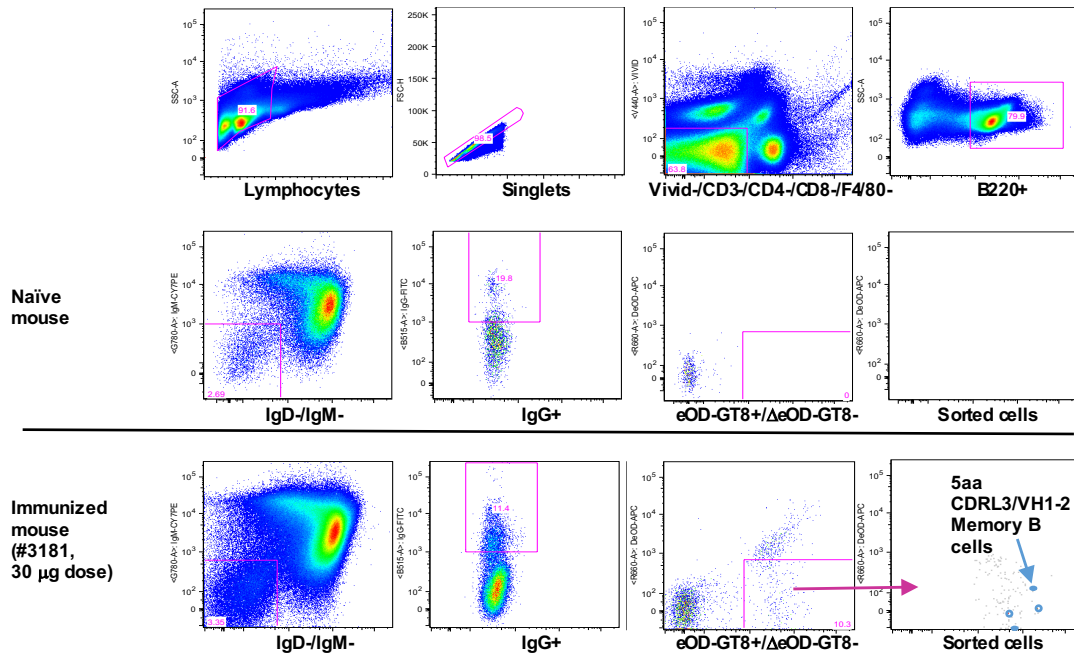

B

| Antibody name | Binding with eOD-GT8 |                        |                        | Binding with DeOD-GT8 |                        |                        |
|---------------|----------------------|------------------------|------------------------|-----------------------|------------------------|------------------------|
|               | K <sub>D</sub> (M)   | K <sub>ON</sub> (1/Ms) | K <sub>OFF</sub> (1/s) | K <sub>D</sub> (M)    | K <sub>ON</sub> (1/Ms) | K <sub>OFF</sub> (1/s) |
| VRC01 gHvGLv  | 4.89E-10             | 1.22E+05               | 5.98E-05               | 3.09E-06              | 1.97E+03               | 6.11E-03               |
| VRC01         | 7.34E-10             | 3.07E+05               | 2.26E-04               | 1.62E-06              | 1.28E+04               | 2.07E-02               |
| 3181-GT6-B7   | 9.52E-09             | 2.12E+05               | 2.02E-03               | N.D.                  | N.D.                   | N.D.                   |
| 3185-P1-H3    | 9.12E-08             | 9.94E+04               | 9.07E-03               | N.D.                  | N.D.                   | N.D.                   |
| 3181-GT6-E1   | 1.43E-07             | 9.83E+04               | 1.41E-02               | N.D.                  | N.D.                   | N.D.                   |
| 3182-C2       | 1.75E-07             | 8.62E+04               | 1.51E-02               | N.D.                  | N.D.                   | N.D.                   |
| 3184-P1-F11   | 2.44E-07             | 7.77E+04               | 1.89E-02               | N.D.                  | N.D.                   | N.D.                   |
| 3185-P1-G1    | 3.94E-07             | 8.80E+04               | 3.47E-02               | N.D.                  | N.D.                   | N.D.                   |
| 3181-P2-E1    | 5.43E-07             | 8.72E+04               | 4.74E-02               | N.D.                  | N.D.                   | N.D.                   |

N.D: not detected at 5μM.

C

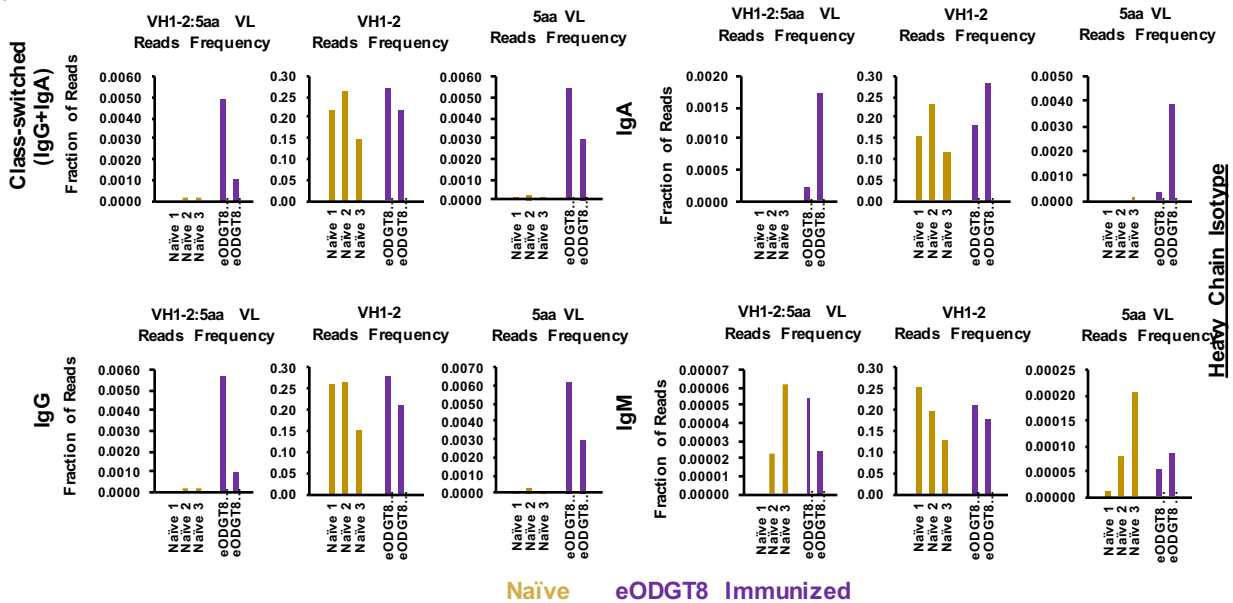

Supplement: NIHMS811997-supplement-2.pdf [file NIHMS811997-supplement-2.pdf]
