# Supplementary material
Source: PubMed Central journal article supplement (PMC5103708)
Supplement: NIHMS811997-supplement-6.pdf [file NIHMS811997-supplement-6.pdf]

**Figure S7 Related to Figure 7**

| <b>IC<sub>50</sub> (µg/ml)</b>      |                | 45_01dH5<br>(Clade B,<br>Tier II) | 45_01d<br>H1   | 00836<br>-2.5 | BJOX025<br>000.01.<br>1 | CM244.ec<br>1     | CNE3          | CNE7             |
|-------------------------------------|----------------|-----------------------------------|----------------|---------------|-------------------------|-------------------|---------------|------------------|
| <b>Virus Clade</b>                  | B              | B                                 | C              | AE            | AE                      | AE                | AE            |                  |
| <b>276/460/<br/>463<br/>glycans</b> | -/+ / +        | + / + / +                         | - / - / -      | - / + / +     | - / - /<br>(462+)       | - / - /<br>(462+) | -             | (461+)<br>(464+) |
| <b>Weeks</b>                        | <b>mAb ID</b>  |                                   |                |               |                         |                   |               |                  |
| 2                                   | 1540-E9        |                                   |                |               |                         |                   |               |                  |
| 6                                   | 1536-hvk-E6    |                                   |                |               |                         |                   |               |                  |
| 10                                  | 1539-A1        |                                   |                |               |                         |                   |               |                  |
|                                     | 1539-B10       |                                   |                |               |                         |                   |               |                  |
|                                     | 1539-B3        |                                   | >50            | >50           | >50                     | >50               | >50           | >50              |
|                                     | 1539-B5        |                                   |                |               |                         |                   |               |                  |
|                                     | 1539-B9        |                                   | >50            | >50           | >50                     | >50               | >50           | >50              |
|                                     | 1539-C8        |                                   | >50            | >50           | >50                     | >50               | >50           | >50              |
|                                     | <b>1539-E6</b> | <b>0.9700</b>                     | >50            | >50           | >50                     | >50               | >50           | >50              |
|                                     | 1539-G2        |                                   | >50            | >50           | >50                     | >50               | >50           | >50              |
|                                     | 1539-G5        |                                   | >50            | >50           | >50                     | >50               | >50           | >50              |
| 1539-G6                             |                | >50                               | >50            | >50           | >50                     | >50               | >50           |                  |
| 22                                  | <b>1538-1</b>  | <b>0.5450</b>                     | >50            | >50           | >50                     | >50               | >50           | >50              |
|                                     | 1538-4         |                                   | >50            | >50           | >50                     | >50               | >50           | >50              |
|                                     | 1538-12        |                                   |                |               |                         |                   |               |                  |
|                                     | 1538-17        |                                   | >50            | >50           | >50                     | >50               | >50           | >50              |
|                                     | 1538-19        |                                   | >50            | >50           | >50                     | >50               | >50           | >50              |
|                                     | 1538-20        |                                   | >50            | >50           | >50                     | >50               | >50           | >50              |
|                                     | 1538-26        |                                   | >50            | >50           | >50                     | >50               | >50           | >50              |
|                                     | 1538-65        |                                   | >50            | >50           | >50                     | >50               | >50           | >50              |
|                                     | 1538-67        |                                   |                |               |                         |                   |               |                  |
|                                     | 1538-69        |                                   | >50            | >50           | >50                     | >50               | >50           | >50              |
|                                     | 1538-76        |                                   | >50            | >50           | >50                     | >50               | >50           | >50              |
|                                     | <b>1538-79</b> | <b>0.5060</b>                     | >50            | >50           | >50                     | >50               | >50           | >50              |
|                                     | 1538-86        |                                   | >50            | >50           | >50                     | >50               | >50           | >50              |
| 1538-91                             |                |                                   |                |               |                         |                   |               |                  |
| 1538-93                             |                |                                   |                |               |                         |                   |               |                  |
|                                     | <b>VRC01</b>   | <b>0.1490</b>                     | <b>16.1000</b> | <b>0.0520</b> | <b>2.2700</b>           | <b>0.0450</b>     | <b>0.2070</b> | <b>0.2540</b>    |

<0.001

.001-.01

.01-.100

.100-1.00

1.00-10.0

10.0 - 50.0
