# Supplementary material
Source: PubMed Central journal article supplement (PMC5103708)
Supplement: NIHMS811997-supplement-7.pdf [file NIHMS811997-supplement-7.pdf]

**Table S1. Related to Figure 2. Molecular characteristics of the identified VRC01-class antibodies.** Antibodies encoded by the same kappa V-gene allele are grouped together. Synthesized antibodies for further characterization are in red letters. CDR L3 encoded by V genes are in blue letters. Sequence ID, CDR L3 and H3 of the antibodies derived from the same clonal family are highlighted in yellow, and CDR L3 of antibodies sharing the same lineage are highlighted in orange.

| Sequence ID        | Kappa chain             |                          |                          |                         |                  |              |                 | Heavy chain             |                          |                          |                         |                         |                  |                         |
|--------------------|-------------------------|--------------------------|--------------------------|-------------------------|------------------|--------------|-----------------|-------------------------|--------------------------|--------------------------|-------------------------|-------------------------|------------------|-------------------------|
|                    | Mouse V-GENE and allele | V-REGION identity % (nt) | V-REGION mutation % (aa) | Mouse J-GENE and allele | CDR-IMGT lengths | CDR1 aa      | AA JUNCTION     | Human V-GENE and allele | V-REGION identity % (nt) | V-REGION mutation % (aa) | Mouse J-GENE and allele | Mouse D-GENE and allele | CDR-IMGT lengths | AA JUNCTION             |
| <b>3181-GT6-E1</b> | IGKV4-57-1*01 F         | 98                       | 3                        | IGKJ4*01 F              | [7.3.5]          | SSVSSSY      | <b>CQQYSAF</b>  | IGHV1-2*02 F            | 100                      | 0                        | IGHJ2*01 F              | IGHD2-3*01 F            | [8.8.14]         | <b>CARVPAYDGYYSFDYW</b> |
| <b>3181-GT6-A1</b> |                         | 97                       | 3                        | IGKJ4*01 F              | [7.3.5]          | SSVSSSY      | <b>CQQYSAF</b>  |                         | 100                      | 0                        | IGHJ2*02 F              | IGHD2-3*01 F            | [8.8.14]         | <b>CARVPAYDGYYSFDYW</b> |
| <b>3180-A4</b>     | IGKV4-61*01 F           | 95                       | 4                        | IGKJ1*01 F, or 02 F     | [5.3.5]          | SSVSY        | <b>CQQYQTF</b>  | IGHV1-2*02 F            | 94                       | 9                        | IGHJ2*01 F              | IGHD2-4*01 F            | [8.8.11]         | CARDNDYSYFDYW           |
| <b>3182-C2</b>     |                         | 96                       | 3                        | IGKJ1*02 F(c)           | [5.3.5]          | SSVSY        | <b>CQQYETF</b>  |                         | 93                       | 10                       | IGHJ2*01 F              | IGHD2-4*01 F            | [8.8.10]         | CATMTTGYFDYW            |
| <b>3181-E7</b>     |                         | 96                       | 4                        | IGKJ1*01 F              | [5.3.5]          | SSVSY        | <b>CQLYQTF</b>  |                         | 99                       | 3                        | IGHJ1*01 F              | IGHD3-3*01 F            | [8.8.10]         | CARDGTGYFDYW            |
| <b>3181-P2-E1</b>  |                         | 96                       | 7                        | IGKJ1*01 F, or 02 F     | [5.3.5]          | SSVSY        | <b>CQR YQTF</b> |                         | 99                       | 2                        | IGHJ2*01 F              | IGHD3-3*01 F            | [8.8.12]         | CAKRDWDGNYFDYW          |
| <b>3183-G10</b>    |                         | 96                       | 8                        | IGKJ2*01 F              | [5.3.5]          | SSISY        | <b>CQQYQSF</b>  |                         | 98                       | 6                        | IGHJ2*01 F              | IGHD1-1*02 F            | [8.8.9]          | CARDGGYDYW              |
| <b>3181-GT6-B7</b> | IGKV4-86*01 F           | 97                       | 7                        | IGKJ4*01 F              | [5.3.5]          | SSVNY        | <b>CQQWSYF</b>  | IGHV1-2*02 F            | 98                       | 5                        | IGHJ3*01 F              | IGHD1-1*02 F            | [8.8.13]         | <b>CARRDDYDGGWFAYW</b>  |
| <b>3181-A11</b>    |                         | 97                       | 7                        | IGKJ4*01 F              | [5.3.5]          | SSVNY        | <b>CQQWSYF</b>  |                         | 98                       | 5                        | IGHJ3*01 F              |                         | [8.8.13]         | <b>CARRDDYDGGWFAYW</b>  |
| <b>3185-P2-A6</b>  | IGKV6-23*01 F           | 96                       | 7                        | IGKJ2*01 F              | [6.3.5]          | QDVGTA       | <b>CQQYSTF</b>  | IGHV1-2*02 F            | 99                       | 3                        | IGHJ1*01 F              | IGHD4-1*01 F            | [8.8.13]         | CALLPAGTGCFFDGW         |
| <b>3185-P1-H3</b>  |                         | 97                       | 5                        | IGKJ2*01 F              | [6.3.5]          | QDVGTA       | <b>CQQYSTF</b>  |                         | 98                       | 4                        | IGHJ1*01 F              | IGHD4-1*02 F            | [8.8.13]         | CARVPTGTGWHFDVW         |
| <b>3184_P1-A1</b>  | IGKV8-30*01 F           | 97                       | 3                        | IGKJ1*01 F              | [12.3.5]         | QSLLYSSNQKNY | <b>CQQYYTF</b>  | IGHV1-2*02 F            | 98                       | 3                        | IGHJ2*01 F              | IGHD1-3*01 F            | [8.8.10]         | CARKGGSYFDYW            |
| <b>3184_P1-F11</b> |                         | 96                       | 6                        | IGKJ1*01 F              | [12.3.5]         | QSLLYSSNQKNY | <b>CQQYNTF</b>  |                         | 99                       | 3                        | IGHJ2*01 F              | IGHD3-2*02 F            | [8.8.10]         | CARQGGSYFDYW            |
| <b>3184-P2_B12</b> |                         | 98                       | 1                        | IGKJ4*01 F              | [12.3.5]         | QSLLYSSNQKNY | <b>CQQYYTF</b>  |                         | 100                      | 0                        | IGHJ2*01 F              | IGHD4-1*01 F            | [8.8.10]         | CAREIGTYFDYW            |
| <b>3185-P1-G1</b>  | IGKV10-96*01 F          | 96                       | 5                        | IGKJ1*01 F              | [6.3.5]          | QDISNY       | <b>CQQDNTF</b>  | IGHV1-2*02 F            | 99                       | 2                        | IGHJ4*01 F              | IGHD5-7*01 ORF          | [8.8.11]         | CARQFDRGSMYDW           |
| <b>3181-F12</b>    | IGKV17-121*01 F         | 95                       | 9                        | IGKJ2*01 F              | [6.3.5]          | TDIDDD       | <b>CLHMYTF</b>  | IGHV1-2*02 F            | 100                      | 0                        | IGHJ1*01 F              | IGHD2-2*01 F            | [8.8.14]         | CARWIYGYDKYFDVW         |

**Table S2. Related to Figure 2. Summary of immunization studies performed on heterozygous V<sub>H</sub>1-2 mice using VRC01-class germline-binding immunogens other than eOD-GT8 60mer.** CD4 binding site-specific IgG<sup>+</sup> memory B cells were sorted using the eOD-GT6 and ΔeOD-GT6 probes as described in experimental procedures. IgH and IgL chains were amplified and the number of V<sub>H</sub>1-2 HCs and 5aa CDR L3 LCs were listed.

| Study            | Immunization method                                                   | Number of Mice | Total B cells for sorting | Number of Sorted B cells | Number of V <sub>H</sub> 1-2 HCs | Number of 5aa CDRL3 LCs |
|------------------|-----------------------------------------------------------------------|----------------|---------------------------|--------------------------|----------------------------------|-------------------------|
| eOD-GT6 60mer x4 | eOD-GT6 60mer 4 times                                                 | 3              | 1.16E+06                  | 171                      | 29                               | 0                       |
| eOD-GT6 60mer x3 | eOD-GT6 60mer 3 times                                                 | 4              | 9.64E+05                  | 66                       | 10                               | 0                       |
| Sequential       | eOD-GT6 60mer 2 times /426C-Ferritin core/C13-Ferritin                | 3              | 5.35E+05                  | 66                       | 12                               | 0                       |
|                  | eOD-GT6 60mer 2 times /C13-Ferritin/426C-Ferritin core                | 3              | 2.77E+05                  | 50                       | 13                               | 0                       |
|                  | 426C-Ferritin core 2 times /eOD-GT6 60mer/C13-Ferritin                | 3              | 3.09E+05                  | 60                       | 14                               | 0                       |
|                  | C13-Ferritin 2 times /eOD-GT6 60mer/426C-Ferritin core                | 3              | 1.45E+05                  | 13                       | 7                                | 0                       |
|                  | Mixture of eOD-GT6 60mer, 426C-Ferritin core and C13-Ferritin 4 times | 3              | 4.37E+05                  | 47                       | 4                                | 0                       |
| Total            |                                                                       | 22             | 3.83E+06                  | 473                      | 89                               | 0                       |

**Table S3. Related to Figure 2. Summary of paired HC-LC sequencing.**

| <i>Mouse ID</i>                               | <i>2890</i> | <i>2725</i> | <i>3994</i> | <i>3181</i>    | <i>3182</i>    |
|-----------------------------------------------|-------------|-------------|-------------|----------------|----------------|
|                                               | Naïve 1     | Naïve 2     | Naïve 3     | eOD-GT8-30µg-1 | eOD-GT8-30µg-2 |
| B cells emulsified (million)                  | 2.0         | 1.9         | 1.4         | 2.5            | 0.8            |
| Total sequencing reads                        | 563,227     | 1,105,376   | 1,557,620   | 5,568,478      | 5,725,480      |
| Reads after quality-filtering*                | 289,522     | 429,267     | 1,017,553   | 3,098,129      | 2,717,338      |
| Est. antibody lineages**                      | 5,523       | 6,586       | 11,026      | 4,609          | 8,251          |
| hu_VH1-2 reads                                | 63,232      | 102,011     | 128,414     | 384,713        | 329,154        |
| 5aa CDR-L3 reads                              | 5           | 77          | 157         | 7,469          | 4,046          |
| hu_VH1-2+5aa_CDR-L3 reads                     | 0           | 12          | 30          | 6,792          | 1,419          |
| Class-switched reads after quality filtering* | 72,542      | 315,436     | 582,883     | 1,366,695      | 1,327,508      |
| Class-switched est. antibody lineages**       | 1,146       | 2,383       | 3,137       | 2,060          | 3,528          |
| Class-switched hu_VH1-2 reads                 | 15,895      | 84,008      | 86,059      | 368,817        | 292,251        |
| Class-switched 5aa CDR-L3 reads               | 3           | 70          | 88          | 7,465          | 4,029          |
| Class-switched hu_VH1-2+5aa_CDR-L3 reads      | 0           | 10          | 9           | 6,788          | 1,414          |
| IgG reads after quality filtering*            | 44,297      | 303,710     | 464,108     | 1,195,909      | 1,184,144      |
| IgG est. antibody lineages**                  | 472         | 1,809       | 1,232       | 834            | 1,954          |
| IgG hu_VH1-2 reads                            | 11,527      | 81,292      | 71,959      | 337,430        | 251,865        |
| IgG 5aa CDR-L3 reads                          | 3           | 70          | 84          | 7,402          | 3,482          |
| IgG hu_VH1-2+5aa_CDR-L3 reads                 | 0           | 10          | 9           | 6,750          | 1,168          |
| IgA reads after quality filtering*            | 28,245      | 11,726      | 118,775     | 170,786        | 143,364        |
| IgA est. antibody lineages**                  | 674         | 574         | 1,905       | 1,226          | 1,574          |
| IgA hu_VH1-2 reads                            | 4,368       | 2,716       | 14,100      | 31,387         | 40,386         |
| IgA 5aa CDR-L3 reads                          | 0           | 0           | 4           | 63             | 547            |
| IgA hu_VH1-2+5aa_CDR-L3 reads                 | 0           | 0           | 0           | 38             | 246            |
| IgM reads after quality filtering*            | 187,373     | 90,735      | 338,867     | 74,651         | 206,313        |
| IgM est. antibody lineages**                  | 4,377       | 4,203       | 7,889       | 2,549          | 4,723          |
| IgM hu_VH1-2 reads                            | 47,337      | 18,003      | 42,355      | 15,896         | 36,903         |
| IgM 5aa CDR-L3 reads                          | 2           | 7           | 69          | 4              | 17             |
| IgM hu_VH1-2+5aa_CDR-L3 reads                 | 0           | 2           | 21          | 4              | 5              |

\*R1/R2 filtered (Q-score 20 over 50% of the read), productive junction, and same VH:VL sequence (CDR H3:CDR-L3 nucleotide seq\_gene ID\_isotype) observed  $\geq 2$  times

\*\*Estimated by 96% identity clustering of CDR-H3 nucleotide sequences

**Table S4. Related to Figure 4. Summary of single-cell RT-PCR results for the V<sub>H</sub>1-2/LC knock-in mouse study.** V<sub>H</sub>1-2 HCs and V<sub>κ</sub>3-20 LCs were amplified with gene-specific primers from sorted eODGT6<sup>+</sup>/ΔeODGT6<sup>-</sup>/IgG<sup>+</sup> B cells by single cell RT-PCR and sequenced. The number of sorted B cells used for single cell PCR, the number of confirmed V<sub>H</sub>1-2 (H) and V<sub>κ</sub>3-20 (L) chains from the PCR, the number of V<sub>H</sub>1-2/V<sub>κ</sub>3-20 paired IgGs, the average nucleotide mutation rates and the mutation range (in parentheses) in all paired V<sub>H</sub>1-2 and V<sub>κ</sub>3-20 are listed for each sample in the table.

|                                  | naïve              | G1                 |                    |                    | G2                 |                    |                    |                    |                    |
|----------------------------------|--------------------|--------------------|--------------------|--------------------|--------------------|--------------------|--------------------|--------------------|--------------------|
| Mouse ID (sacrifice time)        | #1531<br>(wk0)     | #1532<br>(wk2)     | #1533<br>(wk22)    | #1534<br>(wk22)    | #1540<br>(wk2)     | #1536<br>(wk6)     | #1539<br>(wk10)    | #1537<br>(wk14)    | #1538<br>(wk22)    |
| Cells used for single cell PCR   | 80                 | 103                | 96                 | 96                 | 88                 | 156                | 96                 | 95                 | 96                 |
| Verified VH1-2, VK3-20           | 50H, 56L           | 28H, 67L           | 63H, 71L           | 50H, 75L           | 38H, 58L           | 63H, 61L           | 58H, 77L           | 50H, 50L           | 60H, 78L           |
| Paired VH1-2/VK3-20              | 43                 | 24                 | 55                 | 46                 | 37                 | 57                 | 53                 | 50                 | 56                 |
| Paired VH1-2 mutation rate (nt)  | 0.48%<br>(0-3.82%) | 0.55%<br>(0-3.47%) | 0.34%<br>(0-3.13%) | 0.40%<br>(0-3.12%) | 0.67%<br>(0-3.82%) | 1.30%<br>(0-4.90%) | 1.99%<br>(0-6.60%) | 1.56%<br>(0-9.38%) | 2.03%<br>(0-8.68%) |
| Paired VK3-20 mutation rate (nt) | 0.16%<br>(0-1.06%) | 0.31%<br>(0-1.77%) | 0.21%<br>(0-2.13%) | 0.21%<br>(0-1.77%) | 0.45%<br>(0-3.19%) | 0.69%<br>(0-3.60%) | 0.98%<br>(0-3.90%) | 0.72%<br>(0-4.25%) | 0.89%<br>(0-4.96%) |

**Table S5. Related to Figure 5. IgGs with neutralizing activities among the 27 synthesized antibodies identified from the V<sub>H</sub>1-2/LC mice use mouse IGJH1\*01, the ortholog of human IGHJ2\*01. The 27 IgGs were grouped based on whether they neutralize 426c.N276D virus. The mouse IGJH1\*01 are highlighted in yellow and the conserved W (Trp) in CDRH3s is in bold.**

| Sequence ID   | V-GENE and allele   | V-REGION identity % (nt) | J-GENE and allele | D-GENE and allele    | CDR-IMGT lengths | AA JUNCTION         | Neutralize 426c.N276 virus |
|---------------|---------------------|--------------------------|-------------------|----------------------|------------------|---------------------|----------------------------|
| 1538-67_H     | Homsap IGHV1-2*02 F | 99.65% (287/288 nt)      | Musmus IGHJ4*01 F | Musmus IGHD2-4*01 F  | [8.8.17]         | CARVDYDYGDRDYAMDYW  | No                         |
| 1538-91_H     | Homsap IGHV1-2*02 F | 100.00% (288/288 nt)     | Musmus IGHJ3*01 F | Musmus IGHD4-1*01 F  | [8.8.11]         | CARELGLAWFAYW       |                            |
| 1538-93_H     | Homsap IGHV1-2*02 F | 100.00% (288/288 nt)     | Musmus IGHJ3*01 F | Musmus IGHD3-2*01 F  | [8.8.12]         | CARDSSGSAWFAYW      |                            |
| 1539-B10_H    | Homsap IGHV1-2*02 F | 100.00% (288/288 nt)     | Musmus IGHJ3*01 F | Musmus IGHD2-1*01 F  | [8.8.12]         | CARRVYGNVDWAYW      |                            |
| 1539-B9_H     | Homsap IGHV1-2*02 F | 94.79% (273/288 nt)      | Musmus IGHJ3*01 F | Musmus IGHD2-12*01 F | [8.8.13]         | CARRRYNYDWEFVYW     |                            |
| 1540-E9_H     | Homsap IGHV1-2*02 F | 99.65% (287/288 nt)      | Musmus IGHJ2*01 F | Musmus IGHD2-2*01 F  | [8.8.10]         | CARKTTMVFDYW        |                            |
| 1536-hvk-E6_H | Homsap IGHV1-2*02 F | 98.61% (284/288 nt)      | Musmus IGHJ1*02 F | Musmus IGHD2-1*01 F  | [8.8.14]         | CARPGYGNVGYFDVW     |                            |
| 1539-A1_H     | Homsap IGHV1-2*02 F | 96.88% (279/288 nt)      | Musmus IGHJ1*01 F | Musmus IGHD2-14*01 F | [8.8.18]         | CAAAYNYDAESFDVYFDVW |                            |
| 1539-B5_H     | Homsap IGHV1-2*02 F | 95.83% (276/288 nt)      | Musmus IGHJ1*01 F | Musmus IGHD1-2*01 F  | [8.8.13]         | CAVYVYGDVYFDVW      |                            |
| 1538-1_H      | Homsap IGHV1-2*02 F | 96.18% (277/288 nt)      | Musmus IGHJ1*01 F | Musmus IGHD2-4*01 F  | [8.8.14]         | CARYDNDVDGWYFDVW    |                            |
| 1538-12_H     | Homsap IGHV1-2*02 F | 94.79% (273/288 nt)      | Musmus IGHJ1*01 F | Musmus IGHD2-4*01 F  | [8.8.16]         | CARYRNSYDDGKFDVW    |                            |
| 1538-17_H     | Homsap IGHV1-2*02 F | 94.44% (272/288 nt)      | Musmus IGHJ1*01 F | Musmus IGHD2-4*01 F  | [8.8.14]         | CARYDNDGGSFDVW      |                            |
| 1538-19_H     | Homsap IGHV1-2*02 F | 95.14% (274/288 nt)      | Musmus IGHJ1*01 F | Musmus IGHD2-4*01 F  | [8.8.14]         | CARYDNDGGSFDVW      |                            |
| 1538-20_H     | Homsap IGHV1-2*02 F | 95.83% (276/288 nt)      | Musmus IGHJ1*01 F | Musmus IGHD2-4*01 F  | [8.8.14]         | CARYDNDADGWFFDVW    |                            |
| 1538-26_H     | Homsap IGHV1-2*02 F | 91.67% (264/288 nt)      | Musmus IGHJ1*01 F | Musmus IGHD1-3*01 F  | [8.8.14]         | CARYNNEEDGWYFDVW    |                            |
| 1538-4_H      | Homsap IGHV1-2*02 F | 94.79% (273/288 nt)      | Musmus IGHJ1*01 F | Musmus IGHD2-4*01 F  | [8.8.14]         | CARYDHDGPGWYFDVW    |                            |
| 1538-65_H     | Homsap IGHV1-2*02 F | 94.44% (272/288 nt)      | Musmus IGHJ1*01 F | Musmus IGHD2-3*01 F  | [8.8.14]         | CARYDSDGEGWYFDVW    |                            |
| 1538-69_H     | Homsap IGHV1-2*02 F | 94.44% (272/288 nt)      | Musmus IGHJ1*01 F | Musmus IGHD4-1*01 F  | [8.8.13]         | CARDRTGNDWVFDVW     |                            |
| 1538-76_H     | Homsap IGHV1-2*02 F | 96.18% (277/288 nt)      | Musmus IGHJ1*01 F | Musmus IGHD2-4*01 F  | [8.8.14]         | CARYDNDGEGWYFDVW    |                            |
| 1538-79_H     | Homsap IGHV1-2*02 F | 91.32% (263/288 nt)      | Musmus IGHJ1*01 F | Musmus IGHD4-1*01 F  | [8.8.13]         | CARDRTGNDWYFDVW     |                            |
| 1538-86_H     | Homsap IGHV1-2*02 F | 96.18% (277/288 nt)      | Musmus IGHJ1*01 F | Musmus IGHD2-4*01 F  | [8.8.14]         | CARYDNDADGWYFDVW    |                            |
| 1539-B3_H     | Homsap IGHV1-2*02 F | 96.18% (277/288 nt)      | Musmus IGHJ1*01 F | Musmus IGHD2-2*01 F  | [8.8.13]         | CAIYVYVYGDVYFDVW    |                            |
| 1539-C8_H     | Homsap IGHV1-2*02 F | 94.79% (273/288 nt)      | Musmus IGHJ1*01 F | Musmus IGHD2-4*01 F  | [8.8.15]         | CARRGDYDEGDWYFHVW   |                            |
| 1539-E6_H     | Homsap IGHV1-2*02 F | 93.40% (269/288 nt)      | Musmus IGHJ1*01 F | Musmus IGHD3-1*01 F  | [8.8.13]         | CARHIFDSHWYFDVW     |                            |
| 1539-G2_H     | Homsap IGHV1-2*02 F | 96.88% (279/288 nt)      | Musmus IGHJ1*01 F | Musmus IGHD2-4*01 F  | [8.8.15]         | CARPSTYDDYDWFVW     |                            |
| 1539-G5_H     | Homsap IGHV1-2*02 F | 95.49% (275/288 nt)      | Musmus IGHJ1*01 F | Musmus IGHD3-3*01 F  | [8.8.13]         | CAKDMSCGVDWHLVW     |                            |
| 1539-G6_H     | Homsap IGHV1-2*02 F | 94.79% (273/288 nt)      | Musmus IGHJ1*01 F | Musmus IGHD2-4*01 F  | [8.8.15]         | CARPSYDYDHDWYFDVW   |                            |

**Table S6. Related to Figure 2. Primers for single cell RT-PCR in the V<sub>H</sub>1-2 mouse model and the V<sub>H</sub>1-2/LC mouse models (1: derived from Tiller et al, 2009. 2: derived from Wu et al, 2010. \*: New design).**

| Mouse Model                          | PCR step                          | Primer name           | 5'-3' sequence                                   | Reference            |
|--------------------------------------|-----------------------------------|-----------------------|--------------------------------------------------|----------------------|
| VH1-2/IGCR1-<br>single knock-in mice | IgH 1st PCR                       | Vh1-2 For1            | ATGGACTGGACCTGGAGGATCCTCTTCTTGGTG                | VRC design*          |
|                                      |                                   | ZR013-Outer-mCmu      | AGGGGGCTCTCGCAGGAGACGAGG                         | 1                    |
|                                      |                                   | ZR0014-Outer-mCg1     | GGAAGGTGTGCACACCGCTGGAC                          | 1                    |
|                                      |                                   | ZR015-Outer-mCg2c     | GGAAGGTGTGCACACCACTGGAC                          | 1                    |
|                                      |                                   | ZR016-Outer-mCg2b     | GGAAGGTGTGCACACTGCTGGAC                          | 1                    |
|                                      |                                   | ZR017-Outer-mCg3      | AGACTGTGCGCACACCGCTGGAC                          | 1                    |
|                                      |                                   | ZR018-Outer--mCgA     | GAAAGTTCACGGTGGTTATATCC                          | 1                    |
|                                      |                                   | ZR66-mIgD58           | TTTCCTCTGGGGCTTTGCACT                            | JZ design*           |
|                                      | IgH 2nd PCR                       | Vh1-2 For3            | ACAGGAGCCCACTCCAGGTGCAGCTGGTGCA                  | VRC design*          |
|                                      |                                   | ZR007-inner-mCmu      | AGGGGGAAGACATTTGGGAAGGAC                         | 1                    |
|                                      |                                   | ZR008-inner-mCg1      | GCTCAGGGAAATAGCCCTTGAC                           | 1                    |
|                                      |                                   | ZR009-inner-mCg2c     | GCTCAGGGAAATAACCCCTTGAC                          | 1                    |
|                                      |                                   | ZR010-inner-mCg2b     | ACTCAGGGAAAGTAGCCCTTGAC                          | 1                    |
|                                      |                                   | ZR011-inner-mCg3      | GCTCAGGGAAAGTAGCCTTTGAC                          | 1                    |
|                                      |                                   | ZR012-inner-mCgA      | TGCCGAAAGGGAAGTAATCGTGAAT                        | 1                    |
|                                      |                                   | ZR038-Inner-mCd       | TCTGAGAGGAGGAACATGTC                             | 1                    |
|                                      | IgK 1st PCR                       | ZF006-mLVk3           | TGCTGCTGCTCTGGGTTCCAG                            | 1                    |
|                                      |                                   | ZF007-mLVk4           | ATTWTCAGCTTCTGCTAATC                             | 1                    |
|                                      |                                   | ZF008-mLVk5           | TTTTGCTTTTCTGGATTYCAC                            | 1                    |
|                                      |                                   | ZF009-mLVk6           | TCGTGTTKCTSTGGTTGTCTG                            | 1                    |
|                                      |                                   | ZF010-mLVk6-8-9       | ATGGAATCACAGRCYCWGGT                             | 1                    |
|                                      |                                   | ZF011-mLVk14          | TCTTGTGCTCTGGTTYCCAG                             | 1                    |
|                                      |                                   | ZF012-mLVk19          | CAGTTCCTGGGGCTCTTGTGTTTC                         | 1                    |
|                                      |                                   | ZF013-mLVk20          | CTCACTAGCTCTTCTCCTC                              | 1                    |
|                                      |                                   | ZR003-mCK609          | AGTTGATGTCTTGTGAGTGGCCTCA                        | JZ design*           |
|                                      | IgK 2nd PCR                       | ZF047-IgLmVK-Ratner   | CTGGGTTCCAGTTCCACTGGTGACGAYATTGTGMTSACMCARWCTMCA | 1                    |
|                                      |                                   | ZR006-mCK-Tiller      | GATGGTGGGAAGATGGATACAGTT                         | 1                    |
|                                      | VH1-2/VK3-20 double knock-in mice | IgH 1st PCR           | VH1 LEADER-A                                     | ATGGACTGGACCTGGAGGAT |
| 3'musCg-1st                          |                                   |                       | CCCTTGACCAGGCATCCYAG                             | VRC design*          |
| 3'musCm-1st                          |                                   |                       | GGCAGCCCATGGCCACCAGA                             |                      |
| IgH 2nd PCR                          |                                   | xj-VH1-1st:           | ACAGGAGCCCACTCCAGGTGCAG                          |                      |
|                                      |                                   | 3'musCg-2nd           | CCAGGGGCCAGTGGATAGACHGATGG                       |                      |
|                                      |                                   | 3'musCm-2nd           | AGACAGGGGGCTCTCGCAGGA                            |                      |
| IgK 1st PCR                          |                                   | 5' hVK3-20.6          | CGCAGCTTCTCTCCTCCTG                              |                      |
|                                      |                                   | 3'musCk-1st           | ACTGGATGGTGGGAAGATGGA                            |                      |
| IgK 2nd PCR                          | 5' hVK3-20.4                      | ACTCTGGCTCCCAGATACCA  |                                                  |                      |
|                                      | 3'musCk-2nd                       | GGAAGATGGATACAGTTGGTG |                                                  |                      |

**Table S7. Related to Figure 2.** Paired heavy and light chain emulsion linkage RT-PCR primer mix (upper panel) and nested PCR primer mix for amplification of linked VH:VL constructs (lower panel).

| Final conc.<br>(nM) | Primer name      | Sequence 5'-3'                                                   |
|---------------------|------------------|------------------------------------------------------------------|
| 400                 | CH-AHX89         | CGCAGTAGCGGTAACGGC                                               |
| 400                 | CL-BRH06         | GCGGATAACAATTTACACAGG                                            |
| 40                  | mlgG-OE-aPEX     | CGCAGTAGCGGTAACGGC GGACAGGGMTCCAKAGTTCCA                         |
| 40                  | mlgA-OE-aPEX     | CGCAGTAGCGGTAACGGC TCAGGCAGCCGATTATCACG                          |
| 40                  | mlgM-OE-aPEX     | CGCAGTAGCGGTAACGGC CCCCCTGTCTCAGTGTGG                            |
| 40                  | mlgK-OE-aPEX     | GCGGATAACAATTTACACAGG GTTCAAGAAGCACACGACTGAGG                    |
| 40                  | mlgL-OE-aPEX     | GCGGATAACAATTTACACAGG ATCRKACACACSAGTGTGGC                       |
| 40                  | mH-RTL1          | ccagcagctagcgttttagca GA KGT RMA GCT TCA GGA GTC                 |
| 40                  | mH-RTL2          | ccagcagctagcgttttagca GA GGT BCA GCT BCA GCA GTC                 |
| 40                  | mH-RTL3          | ccagcagctagcgttttagca CA GGT GCA GCT GAA GSA STC                 |
| 40                  | mH-RTL4          | ccagcagctagcgttttagca GA GGT CCA RCT GCA ACA RTC                 |
| 40                  | mH-RTL5          | ccagcagctagcgttttagca CA GGT YCA GCT BCA GCA RTC                 |
| 40                  | mH-RTL6          | ccagcagctagcgttttagca CA GGT YCA RCT GCA GCA GTC                 |
| 40                  | mH-RTL7          | ccagcagctagcgttttagca CA GGT CCA CGT GAA GCA GTC                 |
| 40                  | mH-RTL8          | ccagcagctagcgttttagca GA GGT GAA SST GGT GGA ATC                 |
| 40                  | mH-RTL9          | ccagcagctagcgttttagca GA VGT GAW GYT GGT GGA GTC                 |
| 40                  | mH-RTL10         | ccagcagctagcgttttagca GA GGT GCA GSK GGT GGA GTC                 |
| 40                  | mH-RTL11         | ccagcagctagcgttttagca GA KGT GCA MCT GGT GGA GTC                 |
| 40                  | mH-RTL12         | ccagcagctagcgttttagca GA GGT GAA GCT GAT GGA RTC                 |
| 40                  | mH-RTL13         | ccagcagctagcgttttagca GA GGT GCA RCT TGT TGA GTC                 |
| 40                  | mH-RTL14         | ccagcagctagcgttttagca GA RGT RAA GCT TCT CGA GTC                 |
| 40                  | mH-RTL15         | ccagcagctagcgttttagca GA AGT GAA RST TGA GGA GTC                 |
| 40                  | mH-RTL16         | ccagcagctagcgttttagca CA GGT TAC TCT RAA AGW GTS TG              |
| 40                  | mH-RTL17         | ccagcagctagcgttttagca CA GGT CCA ACT VCA GCA RCC                 |
| 40                  | mH-RTL18         | ccagcagctagcgttttagca GA TGT GAA CTT GGA AGT GTC                 |
| 40                  | mH-RTL19         | ccagcagctagcgttttagca GA GGT GAA GGT CAT CGA GTC                 |
| 40                  | huVH1fwd         | ccagcagctagcgttttagca CAGGTCCAGCTKGTTCAGTCTGG                    |
| 40                  | huVH157fwd       | ccagcagctagcgttttagca CAGGTGCAGCTGGTGSARTCTGG                    |
| 40                  | mL-RTL1          | tgctaaaacgctagctgctggttcccatggca G AYA TCC AGC TGA CTC AGC C     |
| 40                  | mL-RTL2          | tgctaaaacgctagctgctggttcccatggca G AYA TTG TTC TCW CCC AGT C     |
| 40                  | mL-RTL3          | tgctaaaacgctagctgctggttcccatggca G AYA TTG TGM TMA CTC AGT C     |
| 40                  | mL-RTL4          | tgctaaaacgctagctgctggttcccatggca G AYA TTG TGY TRA CAC AGT C     |
| 40                  | mL-RTL5          | tgctaaaacgctagctgctggttcccatggca G AYA TTG TRA TGA CMC AGT C     |
| 40                  | mL-RTL6          | tgctaaaacgctagctgctggttcccatggca G AYA TTM AGA TRA MCC AGT C     |
| 40                  | mL-RTL7          | tgctaaaacgctagctgctggttcccatggca G AYA TTC AGA TGA YDC AGT C     |
| 40                  | mL-RTL8          | tgctaaaacgctagctgctggttcccatggca G AYA TYC AGA TGA CAC AGA C     |
| 40                  | mL-RTL9          | tgctaaaacgctagctgctggttcccatggca G AYA TTG TTC TCA WCC AGT C     |
| 40                  | mL-RTL10         | tgctaaaacgctagctgctggttcccatggca G AYA TTG WGC TSA CCC AAT C     |
| 40                  | mL-RTL11         | tgctaaaacgctagctgctggttcccatggca G AYA TTS TRA TGA CCC ART C     |
| 40                  | mL-RTL12         | tgctaaaacgctagctgctggttcccatggca G AYR TTK TGA TGA CCC ARA C     |
| 40                  | mL-RTL13         | tgctaaaacgctagctgctggttcccatggca G AYA TTG TGA TGA CBC AGK C     |
| 40                  | mL-RTL14         | tgctaaaacgctagctgctggttcccatggca G AYA TTG TGA TAA CYC AGG A     |
| 40                  | mL-RTL15         | tgctaaaacgctagctgctggttcccatggca G AYA TTG TGA TGA CCC AGW T     |
| 40                  | mL-RTL16         | tgctaaaacgctagctgctggttcccatggca G AYA TTG TGA TGA CAC AAC C     |
| 40                  | mL-RTL17         | tgctaaaacgctagctgctggttcccatggca G AYA TTT TGC TGA CTC AGT C     |
| 40                  | mL-RT1Lambda     | tgctaaaacgctagctgctggttcccatggca G ARG CTG TTG TGA CTC AGG AAT C |
| 200                 | mlgG-OEnested-4N | NNNN ATGGGCCCTG CCARKGGATAGACHGATGGGG                            |
| 200                 | mlgA-OEnested-4N | NNNN ATGGGCCCTG TGGTGGGATTTCTCGCAGAC                             |
| 200                 | mlgM-OEnested-4N | NNNN ATGGGCCCTG GCAGGAGACGAGGGGGAAGA                             |
| 200                 | mlgK-OEnested-4N | NNNN GTGCGGCCCG GGTGGGAAGATGGATACAGTTGGT                         |
| 200                 | mlgL-OEnested-4N | NNNN GTGCGGCCCG TCAGRGAAGGTGGRAACA                               |
