# Supplementary material
Source: PubMed Central journal article supplement (PMC5103708)

Figure S1 related to Figure 1 and 3

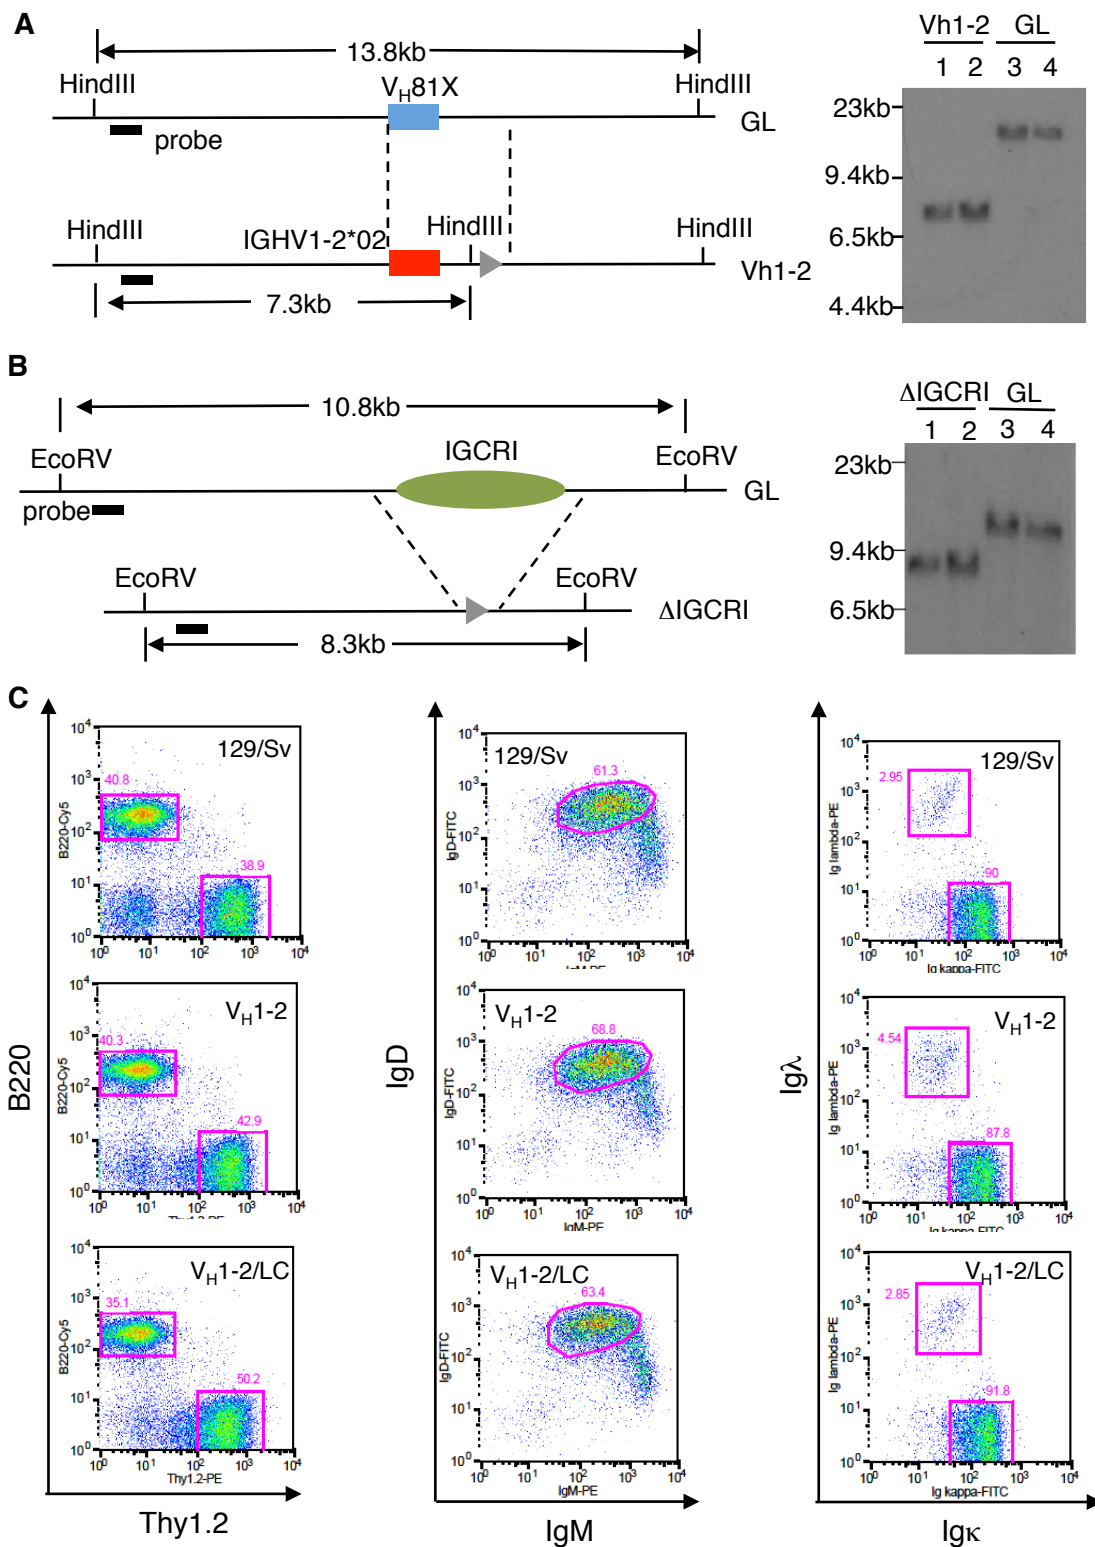

|            | 129/Sv |      |      | VH1-2 |      |      |      | VH1-2/LC |      |      |      |
|------------|--------|------|------|-------|------|------|------|----------|------|------|------|
| Age (days) | 45     | 45   | 51   | 36    | 36   | 36   | 36   | 50       | 52   | 56   | 56   |
| B%         | 33.3   | 50.5 | 40.8 | 42.2  | 46.4 | 50.3 | 44.6 | 40.3     | 35.1 | 35.4 | 36.7 |
| IgM+IgDhi% | 62     | 65.3 | 61.3 | 58.7  | 58.7 | 58.7 | 54.7 | 68.8     | 63.4 | 75.1 | 74.2 |
| Igκ+%      | 96     | 96   | 96.8 | 94.8  | 94.4 | 93.6 | 93.5 | 95.1     | 97   | 97   | 97   |

Supplement: NIHMS811997-supplement-1.pdf [file NIHMS811997-supplement-1.pdf]

Figure S4 Related to Figure 5C

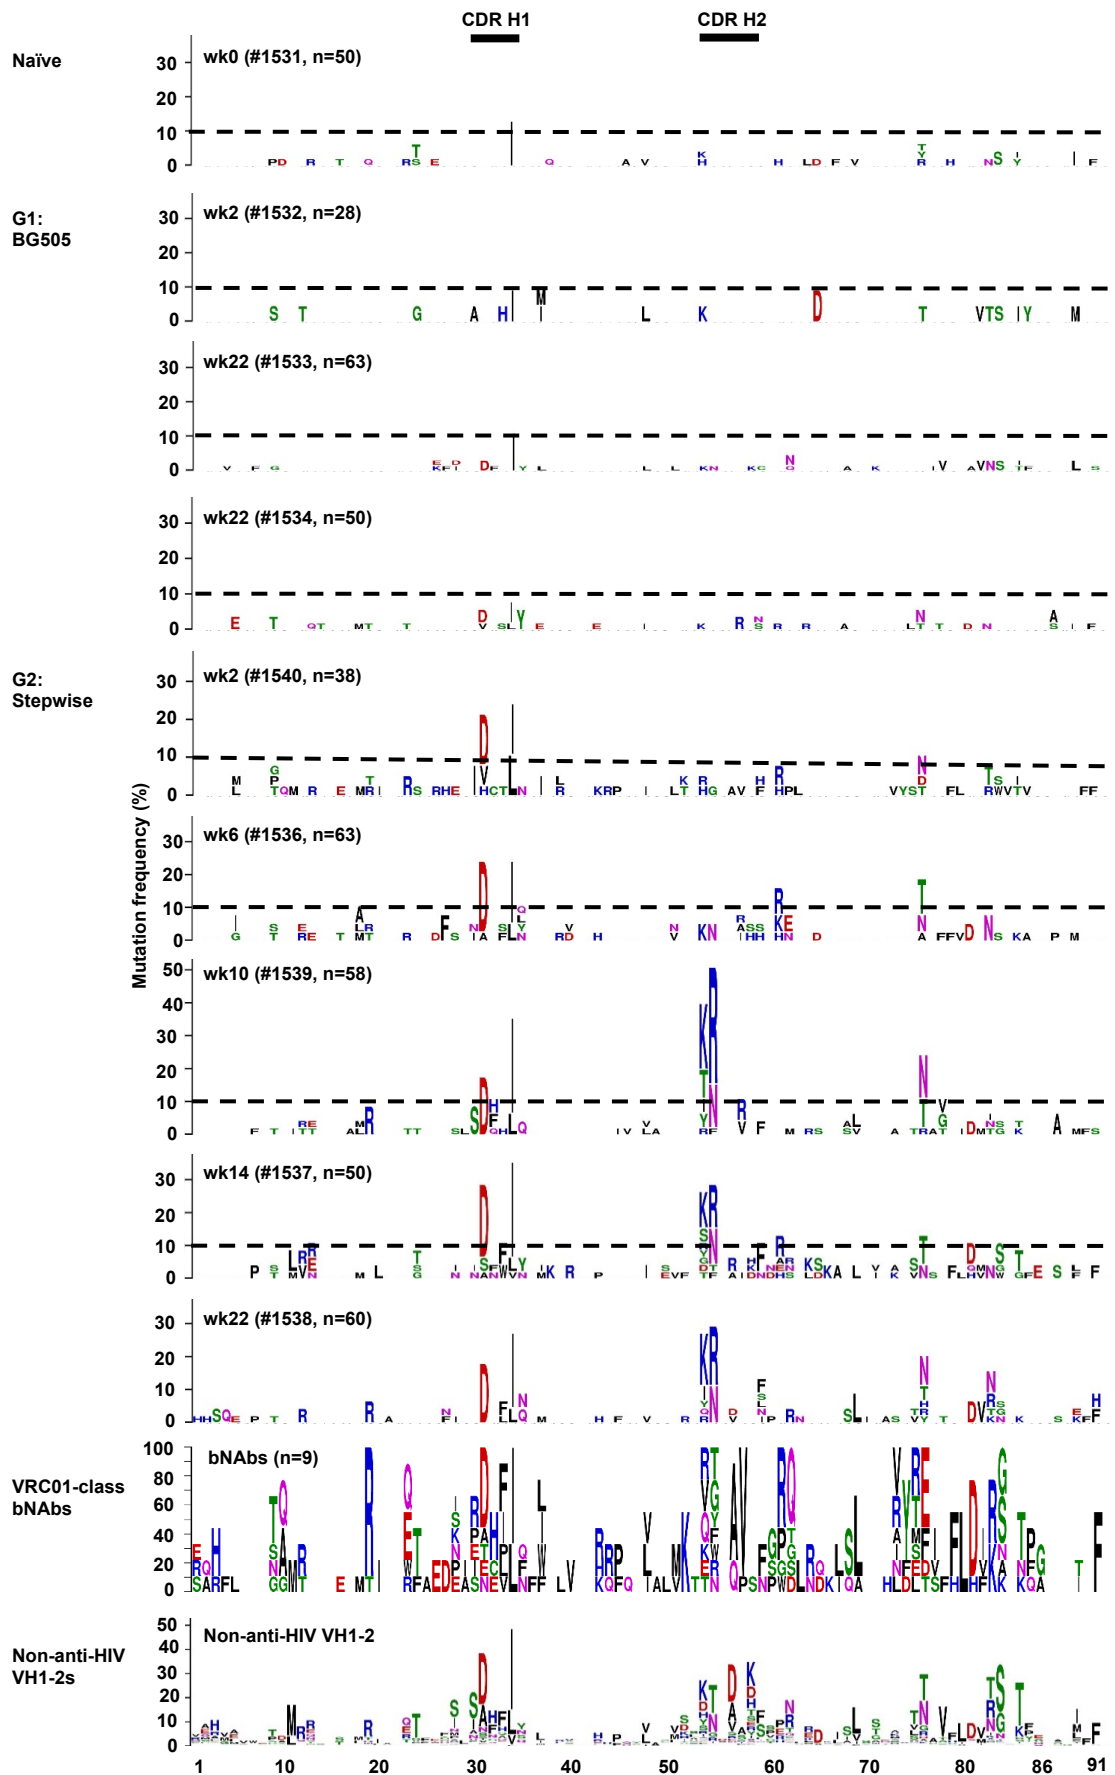

Supplement: NIHMS811997-supplement-3.pdf [file NIHMS811997-supplement-3.pdf]

Figure S5 Related to Figure 5C

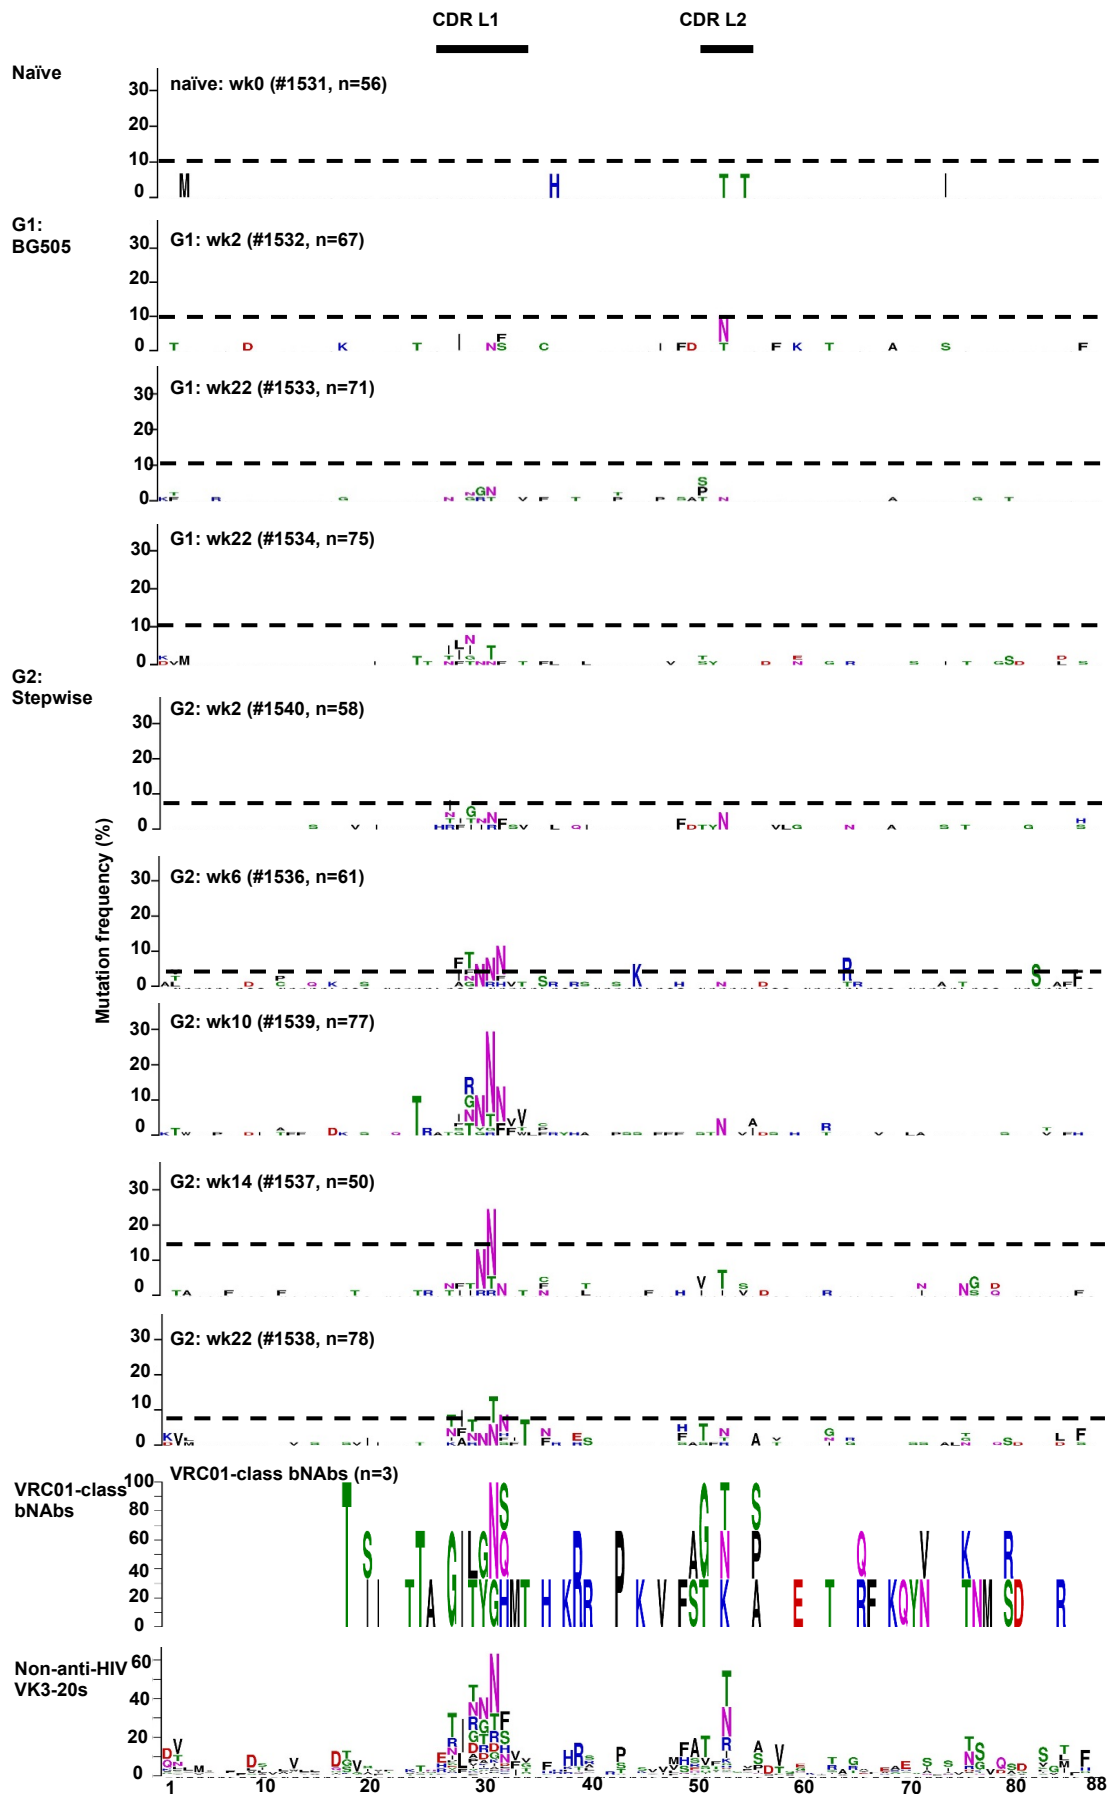

Supplement: NIHMS811997-supplement-4.pdf [file NIHMS811997-supplement-4.pdf]
